# Supplementary material for: Well-aligned metal–organic framework array-derived CoS2 nanosheets toward robust electrochemical water splitting
Source: Royal Society of Chemistry journal article supplement (doi:10.1039/c8qm00259b), 2018-01-01
Supplement: c8qm00259b1.pdf [file c8qm00259b1.pdf]

## Supporting Information

### **Well-aligned metal-organic framework array-derived CoS<sub>2</sub> nanosheets toward robust electrochemical water splitting**

Na Yao, Tan Tan, Fulin Yang, Gongzhen Cheng and Wei Luo\*

College of Chemistry and Molecular Sciences, Wuhan University, Wuhan, Hubei 430072, P. R. China.

Corresponding Author: E-mail: [wluo@whu.edu.cn](mailto:wluo@whu.edu.cn)

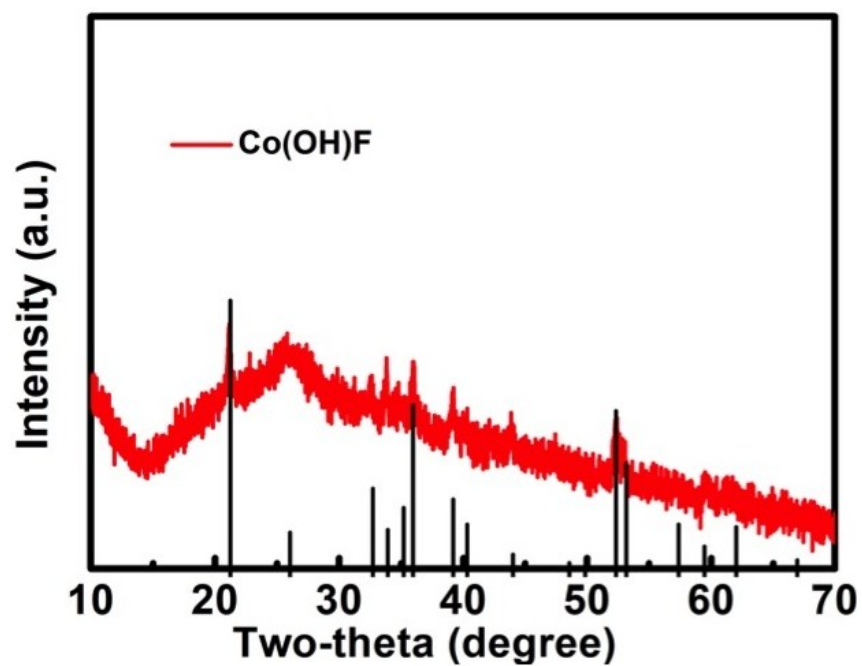

Fig. S1 XRD patterns of Co(OH)F/CC;

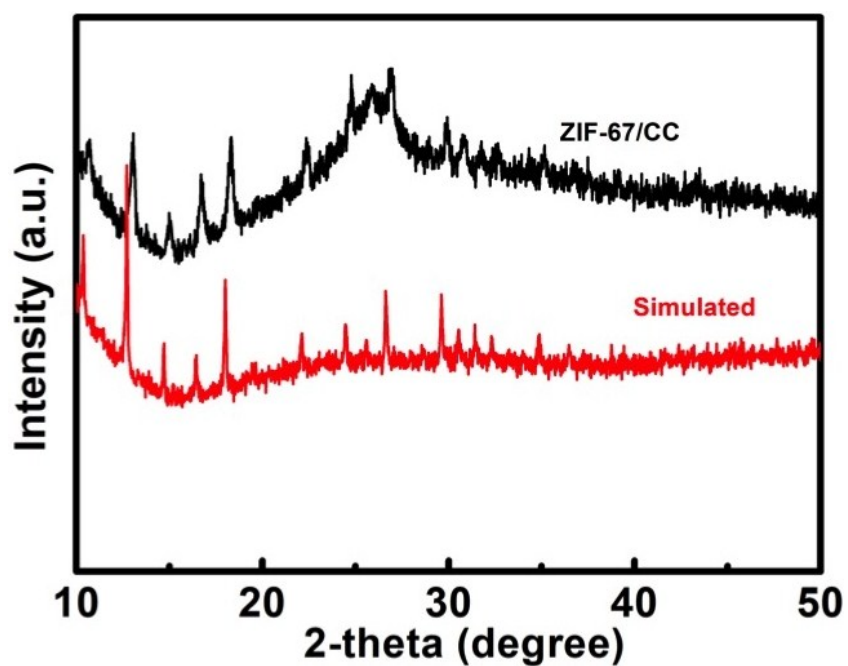

Fig. S2 XRD patterns of ZIF-67/CC;

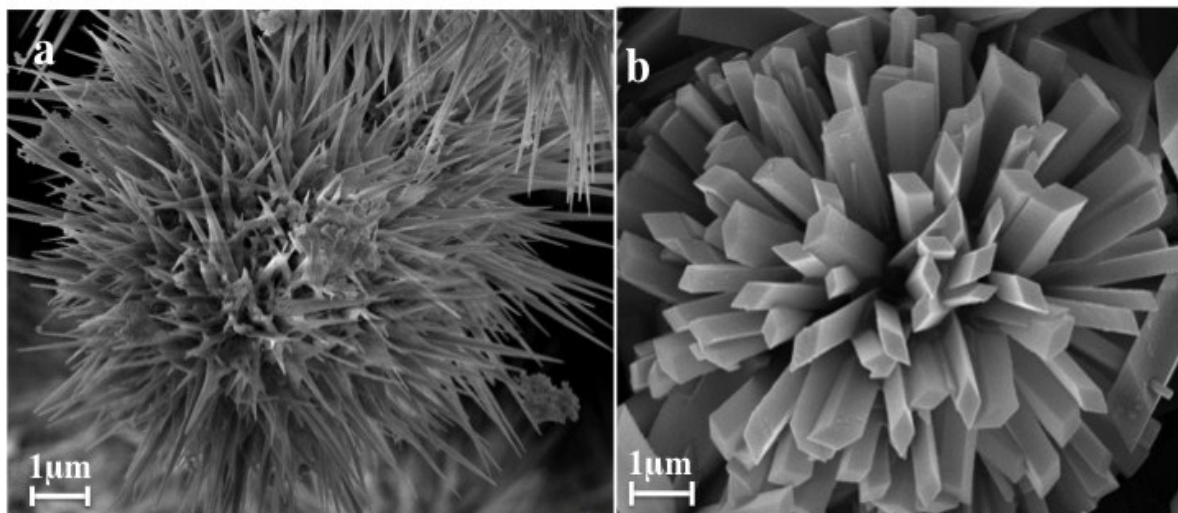

**Fig. S3** SEM images of Co(OH)F/CC(a), and ZIF-67/CC (b)

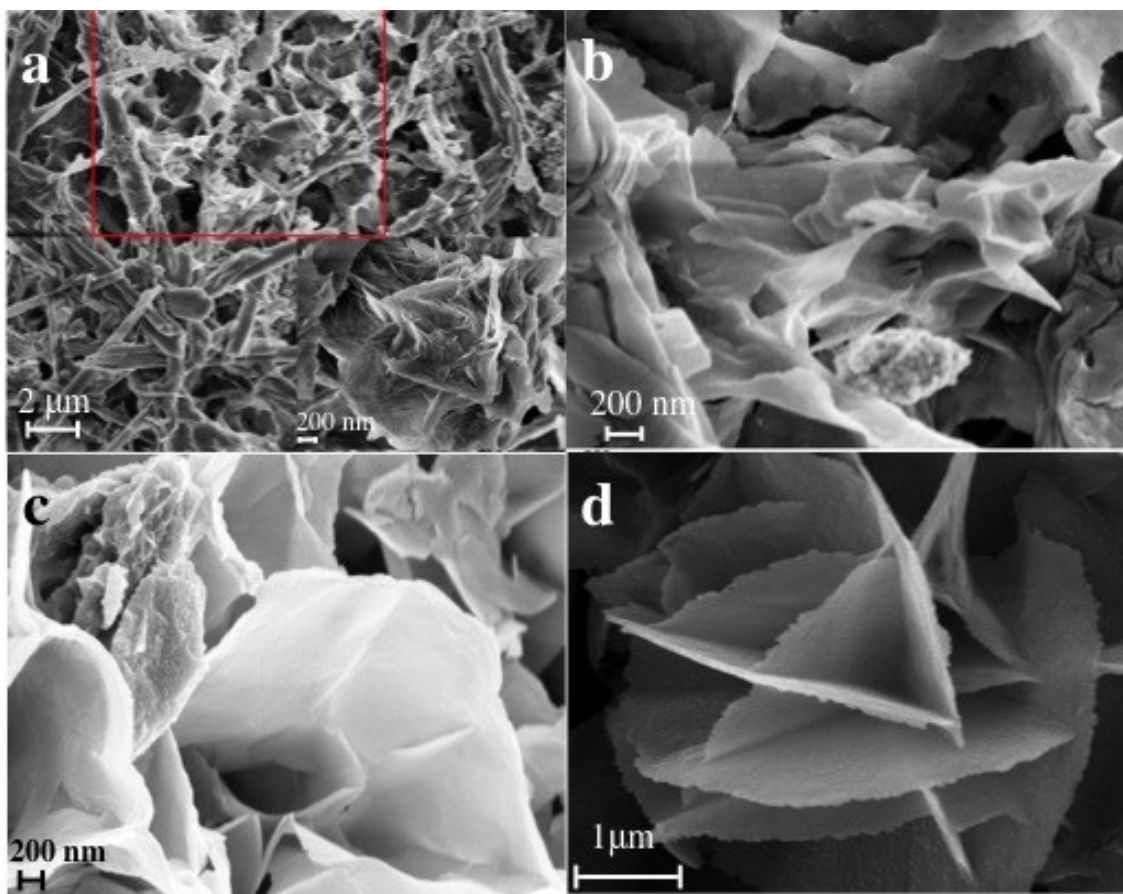

**Fig. S4** SEM images of ZIF-67/CC for vulcanization 30 min (a); 60 min (b); 90 min (c); 120 min (d).

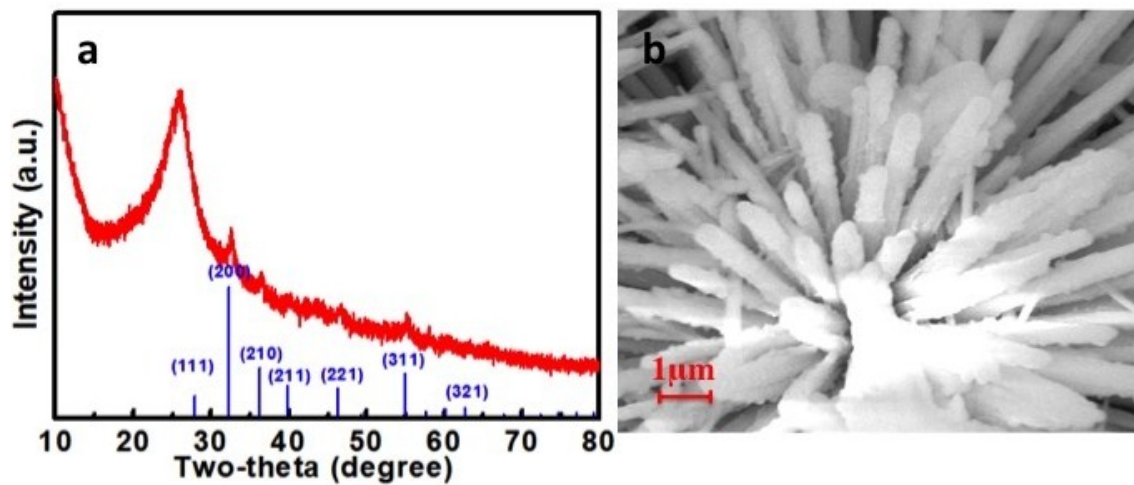

**Fig. S5** XRD pattern and SEM image of  $\text{CoS}_2$  NR/CC.

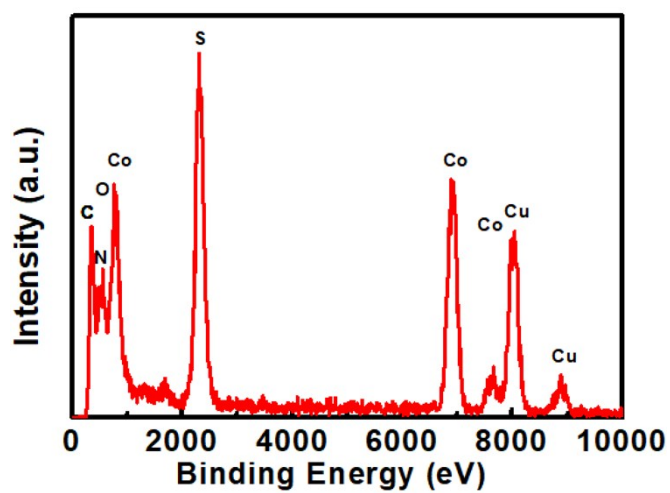

**Fig. S6** EDX spectrum of  $\text{CoS}_2$  NS/CC

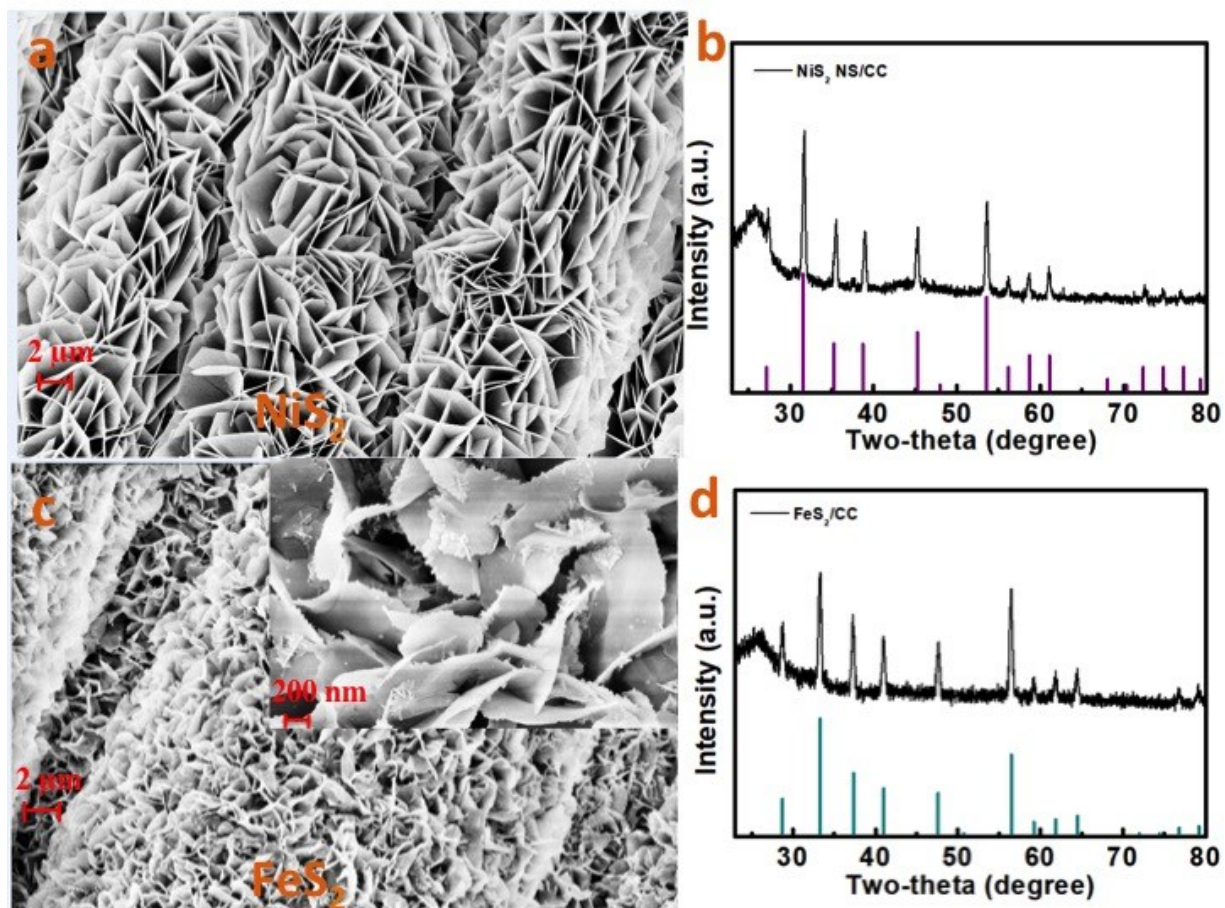

**Fig. S7** (a) SEM images of NiS<sub>2</sub> NS/CC; (b) XRD pattern of NiS<sub>2</sub> NS/CC (PDF#11-0099) ; (c) SEM images of FeS<sub>2</sub> NS/CC; (e) XRD pattern of FeS<sub>2</sub> NS/CC (PDF#42-1340) .

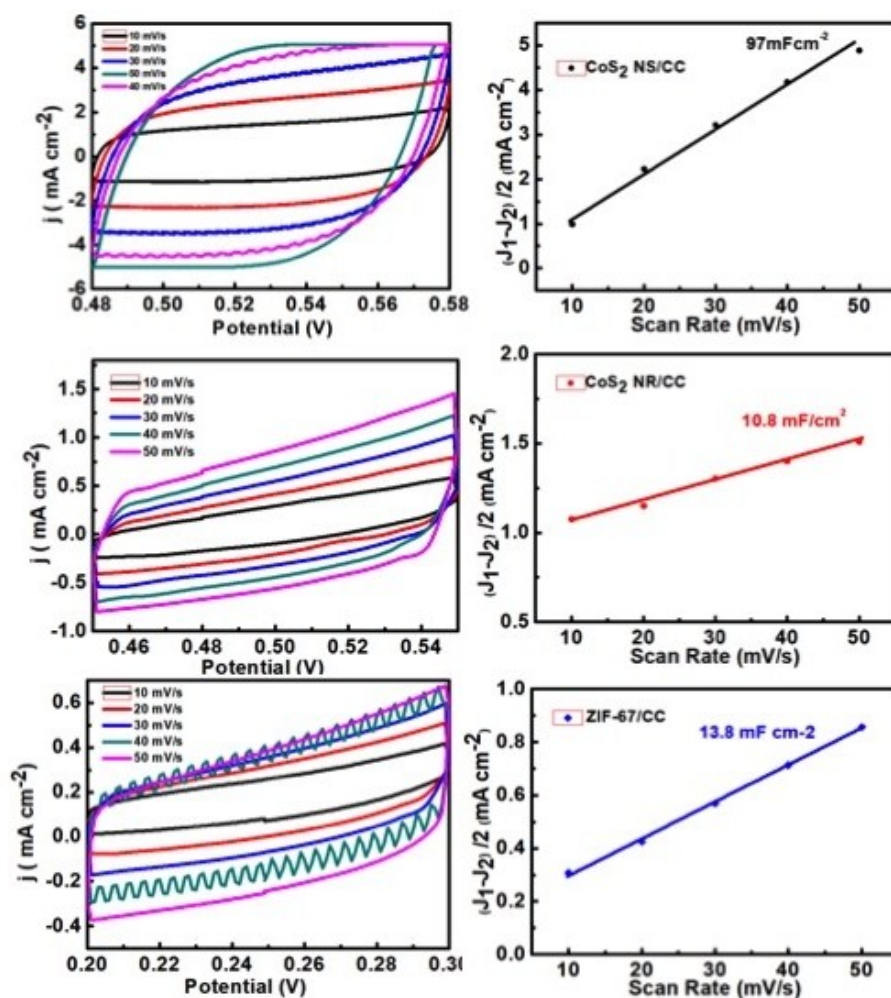

**Fig. S8** (a) Cyclic voltammograms with for capacitive currents at 0.53 V as a function of scan rate in 1.0 M KOH for CoS<sub>2</sub> NS/CC and the Cdl of CoS<sub>2</sub> NS/CC by Linear fitting; (b) CoS<sub>2</sub> NR/CC; (c) ZIF-67/CC.

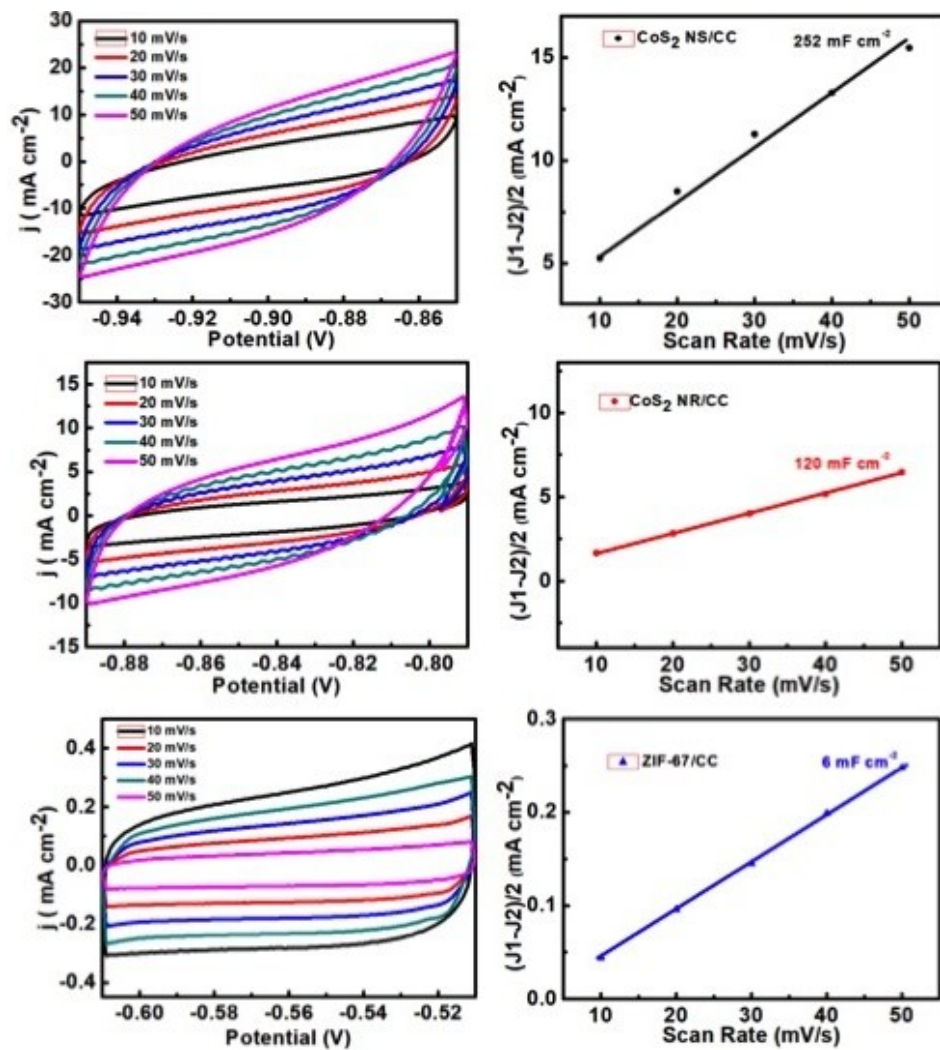

**Fig. S9** (a) Cyclic voltammograms with for capacitive currents at -0.9 V as a function of scan rate in 1.0 M KOH and the  $C_{dl}$  of CoS<sub>2</sub> NS/CC, (b) CoS<sub>2</sub> NR/CC, (c) ZIF-67/CC.



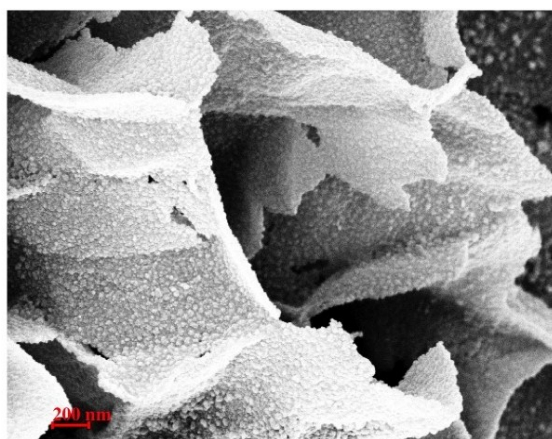

**Fig. S10** SEM images of CoS<sub>2</sub> NS/CC after OER test.

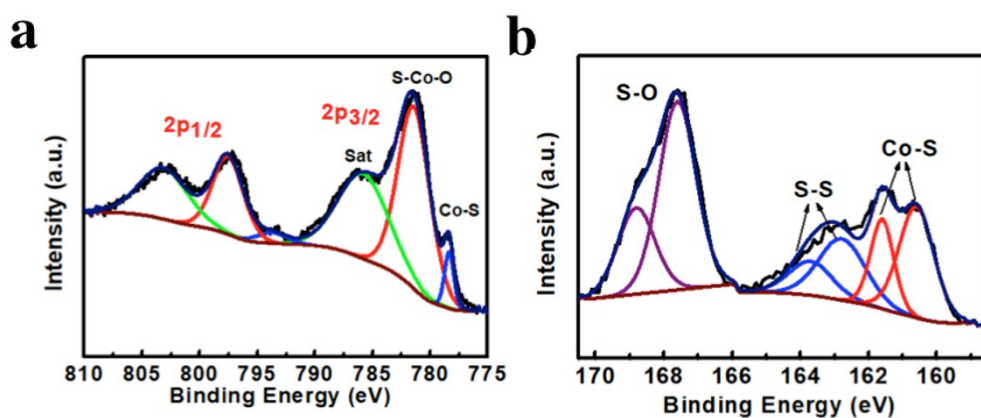

**Fig. S11** XPS pattern of CoS<sub>2</sub> NS/CC after OER

(a) Co 2p spectrum; (b) S 2p spectrum.

(b)

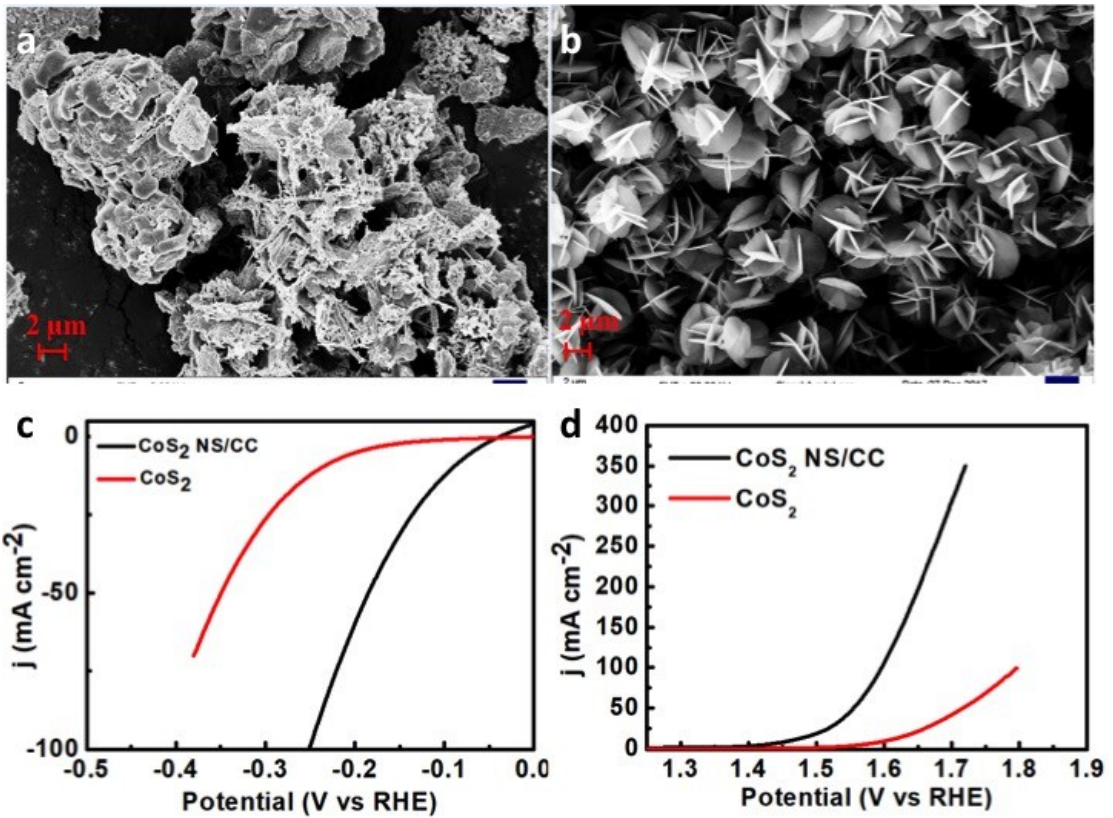

**Fig. S12** (a) SEM images of CoS<sub>2</sub> without carbon cloth; (b) SEM images of CoS<sub>2</sub> NS/CC; (c-d) LSV curves of CoS<sub>2</sub> NS/CC and CoS<sub>2</sub> without carbon cloth.

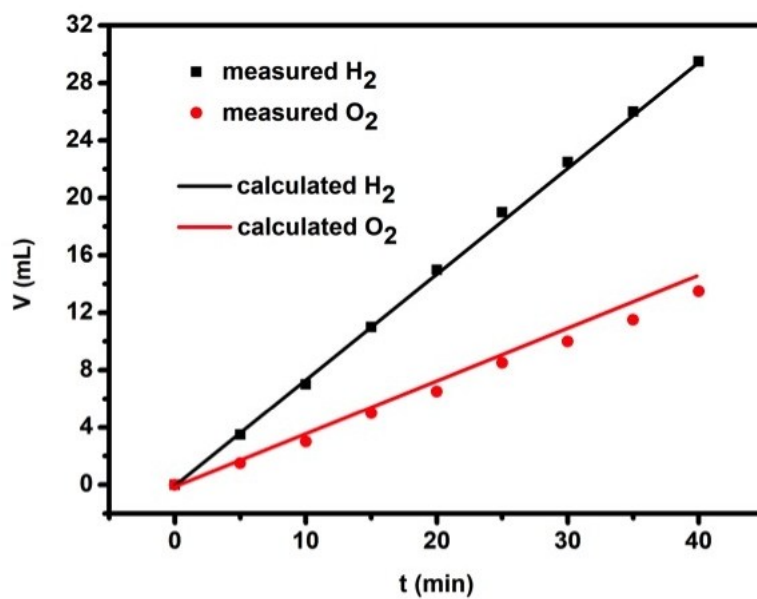

**Fig. S13** Faraday efficiency of H<sub>2</sub> and O<sub>2</sub> production.

**Table S1** Comparison of representative Co-based sulfide OER catalysts in alkaline electrolyte.

| <b>Catalyst</b>                                                      | <b>j (mA cm<sup>-2</sup>)</b> | <b><math>\eta</math> (mV)</b> | <b>Reference</b> |
|----------------------------------------------------------------------|-------------------------------|-------------------------------|------------------|
| CoS <sub>2</sub> SN/CC                                               | 10                            | 85                            | This work        |
|                                                                      | 100                           | 248                           |                  |
| CoS <sub>2</sub> SL/CC                                               | 10                            | 90                            | This work        |
| CoS <sub>2</sub> NTA / CC                                            | 10                            | 193                           | 1                |
| P-Co-Ni-S/NF                                                         | 100                           | 284                           | 2                |
| N-CoS <sub>2</sub> NW/CC                                             | 10                            | 152                           | 3                |
| CoS <sub>2</sub> @NSC/CFP                                            | 10                            | 95                            | 4                |
|                                                                      | 100                           | 158                           |                  |
| Ni <sub>2.3%</sub> -CoS <sub>2</sub> /CC                             | 100                           | 231                           | 5                |
| NiCo <sub>2</sub> S <sub>4</sub> BHSs                                | 1                             | 90                            | 6                |
| Cu@CoS <sub>x</sub> /CF                                              | 10                            | 134                           | 7                |
|                                                                      | 100                           | 267                           |                  |
| NiCo <sub>2</sub> S <sub>4</sub> /Ni <sub>3</sub> S <sub>2</sub> /NF | 10                            | 119                           | 8                |
| Ni <sub>3</sub> S <sub>2</sub> nanorod/NF                            | 10                            | 200                           | 9                |
| Zn-Co-S/CFP                                                          | 10                            | 234                           | 10               |
| MoS <sub>2</sub> -Ni <sub>3</sub> S <sub>2</sub> HNRs/NF             | 10                            | 98                            | 11               |
| Ni <sub>3</sub> S <sub>2</sub> /NF                                   | 10                            | 223                           | 12               |
| NiS/NF                                                               | 20                            | 158                           | 13               |
| CoP/CC                                                               | 10                            | 110                           | 14               |
| S-NiFe <sub>2</sub> O <sub>4</sub>                                   | 10                            | 138                           | 21               |
| CoS <sub>2</sub> HNSs                                                | 10                            | 193                           | 15               |

**Table S2** Comparison of representative Co-based sulfide OER catalysts in alkaline electrolyte.

| Catalyst                                         | j (mA cm <sup>-2</sup> ) | $\eta$ (mV) | Reference |
|--------------------------------------------------|--------------------------|-------------|-----------|
| CoS <sub>2</sub> SN/CC                           | 10                       | 220         | This work |
|                                                  | 100                      | 320         |           |
| CoS <sub>2</sub> SL/CC                           | 10                       | 280         | This work |
| CoS <sub>2</sub> NTA / CC                        | 10                       | 276         | 1         |
| Ni <sub>2.3%</sub> -CoS <sub>2</sub> /CC         | 100                      | 370         | 5         |
| Cu@CoS <sub>x</sub> /CF                          | 10                       | 160         | 7         |
|                                                  | 100                      | 310         |           |
| CoS <sub>2</sub> @NSC                            | 10                       | 470         | 16        |
| Co <sub>3</sub> S <sub>4</sub> @MoS <sub>2</sub> | 10                       | 330         | 17        |
| CuCo <sub>2</sub> S <sub>4</sub>                 | 10                       | 310         | 18        |
| N-CoS <sub>2</sub> /CC                           | 10                       | 240         | 19        |
| CoS <sub>2</sub> HNSs                            | 10                       | 290         | 11        |
| Ni <sub>3</sub> S <sub>2</sub> /NF               | 10                       | 260         | 12        |
| NiS/NF                                           | 50                       | 335         | 13        |
| S-NiFe <sub>2</sub> O <sub>4</sub>               | 10                       | 260         | 21        |
| NiCo <sub>2</sub> (SOH) <sub>x</sub>             | 10                       | 290         | 20        |

**Table S3** Comparison of representative Co-based sulfide water splitting catalysts in alkaline electrolyte.

| Catalyst                                                                          | j (mA cm <sup>-2</sup> ) | E (mV) | Reference |
|-----------------------------------------------------------------------------------|--------------------------|--------|-----------|
| CoS <sub>2</sub> SN/CC-CoS <sub>2</sub> SN/CC                                     | 10                       | 1.58   | This work |
|                                                                                   | 100                      | 1.86   |           |
| CoS <sub>2</sub> NTA/CC-CoS <sub>2</sub> NTA/CC                                   | 10                       | 1.67   | 1         |
| Ni <sub>2.3%</sub> -CoS <sub>2</sub> /CC-Ni <sub>2.3%</sub> -CoS <sub>2</sub> /CC | 10                       | 1.66   | 5         |
| Cu@CoS <sub>x</sub> /CF-Cu@CoS <sub>x</sub> /CF                                   | 100                      | 1.80   | 7         |
| NiS/NF- NiS/NF                                                                    | 10                       | 1.64   | 13        |
| Ni <sub>3</sub> S <sub>2</sub> /NF- Ni <sub>3</sub> S <sub>2</sub> /NF            | 10                       | 1.76   | 12        |
| S-NiFe <sub>2</sub> O <sub>4</sub> - S-NiFe <sub>2</sub> O <sub>4</sub>           | 10                       | 1.65   | 21        |
| NiMoO <sub>4-x</sub> /MoO <sub>2</sub> -NiMoO <sub>4-x</sub> /MoO <sub>2</sub>    | 10                       | 1.56   | 22        |
| CP/CT/Co-S- CP/CT/Co-S                                                            | 10                       | 1.68   | 23        |
| foil/NiCo <sub>2</sub> O <sub>4</sub> -foil/NiCo <sub>2</sub> O <sub>4</sub>      | 10                       | 1.73   | 24        |
| NiCo <sub>2</sub> O <sub>4</sub> HM/NF-NiCo <sub>2</sub> O <sub>4</sub> HM/NF     | 10                       | 1.65   | 25        |

## Reference

1. S. Feng, X. Li, J. Huo, Q. Li, C. Xie, T. Liu, Z. Liu, Z. Wu and S. Wang, *ChemCatChem*, 2018, **10**, 796;
2. F. Zhang, Y. Ge, H. Chu, P. Dong, R. Baines, Y. Pei, M. Ye and J. Shen, *ACS Appl. Mater. Interfaces*, 2018, **10**, 7087;
3. P. Chen, T. Zhou, M. Chen, Y. Tong, N. Zhang, X. Peng, W. Chu, X. Wu, C. Wu, and Y. Xie, *ACS Catal.*, 2017, **7**, 7405;
4. S. Feng, X. Li, J. Huo, Q. Li, C. Xie, T. Liu, Z. Liu, Z. Wu and S. Wang, *ChemCatChem*, 2018, **10**, 796;
5. W. Fang, D. Liu, Q. Lu, X. Sun, A. M. Asiri, *Electrochemistry Communications*, 2016, **63**, 60;
6. Y. Jiang, X. Qian, C. Zhu, H. Liu, and L. Hou, *ACS Appl. Mater. Interfaces* 2018, **10**, 9379;
7. Y. Liu, Q. Li, Rui Si, G.-D. Li, W. Li, D.-P. Liu, D. Wang, L. Sun, Y. Zhang and X. Zou, *Adv. Mater.* 2017, **29**, 1606200;
8. H. Liu, X. Ma, Y. Rao, Yang Liu, J. Liu, L. Wang and M. Wu, *ACS Appl. Mater. Interfaces*, 2018, **10**, 10890;
9. C. Ouyang, X. Wang, C. Wang, X. X. Zhang, J. H. Wu, Z. L. Ma, S. Dou, S. Y. Wang, *Electrochim. Acta*, 2015, **174**, 297;
10. X. Wu, X. Han, X. Ma, W. Zhang, Y. Deng, C. Zhong and W. Hu, *ACS Appl. Mater. Interfaces*, 2017, **9**, 12574;

11. Y. Yang, K. Zhang, H. Lin, X. Li, H. C. Chan, L. Yang and Q. Gao, *ACS Catal.*, 2017, **7**, 2357;
12. L. Feng, G. Yu, Y. Wu, G.-D. Li, Hui Li, Y. Sun, T. Asefa, W. Chen and X. Zou, *J. Am. Chem. Soc.*, 2015, **137**, 14023;
13. W. Zhu, X. Yue, W. Zhang, S. Yu, Y. Zhang, J. Wang and J. Wang, *Chem. Commun.*, 2016, **52**, 1486;
14. J. Tian, Q. Liu, A. M. Asiri and X. Sun, *J. Am. Chem. Soc.*, 2014, **136**, 7587;
15. X. Ma, W. Zhang, Y. Deng, C. Zhong, W. Hu and X. Han, *Nanoscale*, 2018, **10**, 4816;
16. B. Chen, R. Li, G. Ma, X. Gou, Y. Zhu and Y. Xia, *Nanoscale*, 2015, **7**, 20674;
17. Y. Guo, J. Tang, H. Qian, Z. Wang and Y. Yamauchi, *Chem. Mater.*, 2017, **29**, 5566;
18. M. Chauhan, K. P. Reddy, C. S. Gopinath and S. Deka, *ACS Catal.*, 2017, **7**, 5871;
19. J. Hao, W. Yang, Z. Peng, C. Zhang, Z. Huang and W. Shi, *ACS Catal.*, 2017, **7**, 4214;
20. L. Peng, J. Wang, Y. Nie, K. Xiong, Y. Wang, L. Zhang, K. Chen, W. Ding, L. Li and Z. Wei, *ACS Catal.*, 2017, **7**, 8184;
21. J. Liua, D. Zhua, T. Lingb, A. Vasileffa, S.-Z. Qiao, *Nano Energy*, 2017, **40**, 264;
22. Z. Zhanga, X. Maa,b, and J. Tang, *J. Mater. Chem. A*, 2018, Accepted Manuscript.
23. J. Wang, H.-X. Zhong, Z.-L. Wang, F.-L. Meng and X.-b. Zhang, *ACS Nano*, 2016, **10**, 2342;
24. Z. Peng, D. Jia, A. M. Al-Enizi, A. A. Elzatahry, G. Zheng, *Adv. Energy Mater.*, 2015, **5**, 1402031.
25. Gao, H. Zhang, Q. Li, X. Yu, Z. Hong, Z. Zhang, C. Liang, Z. Lin, *Angew. Chem. Int. Ed.* 2016, **55**, 6290;
